# Supplementary material
Source: Royal Society of Chemistry journal article supplement (doi:10.1039/d6em00100a)
Supplement: d6em00100a3.pdf [file d6em00100a3.pdf]

SUPPLEMENTARY INFORMATION

**The use of thermal desorption gas chromatography mass spectrometry (TD-GC-MS) to differentiate sources of plastic pollution**

**SUPPLEMENTARY INFORMATION  
(SUPPLEMENTARY FIGURES)**

**Contents**

|                             |   |
|-----------------------------|---|
| Table of Figures .....      | 1 |
| Supplementary Figures ..... | 2 |

**Table of Figures**

|                                                                                                                     |   |
|---------------------------------------------------------------------------------------------------------------------|---|
| <b>Figure S1:</b> PCA scores plot for environmental balloon samples vs store-bought balloon samples. ....           | 2 |
| <b>Figure S2:</b> PCA scores plot for environmental plastic cups samples vs store-bought plastic cups samples. .... | 2 |

Supplementary Figures

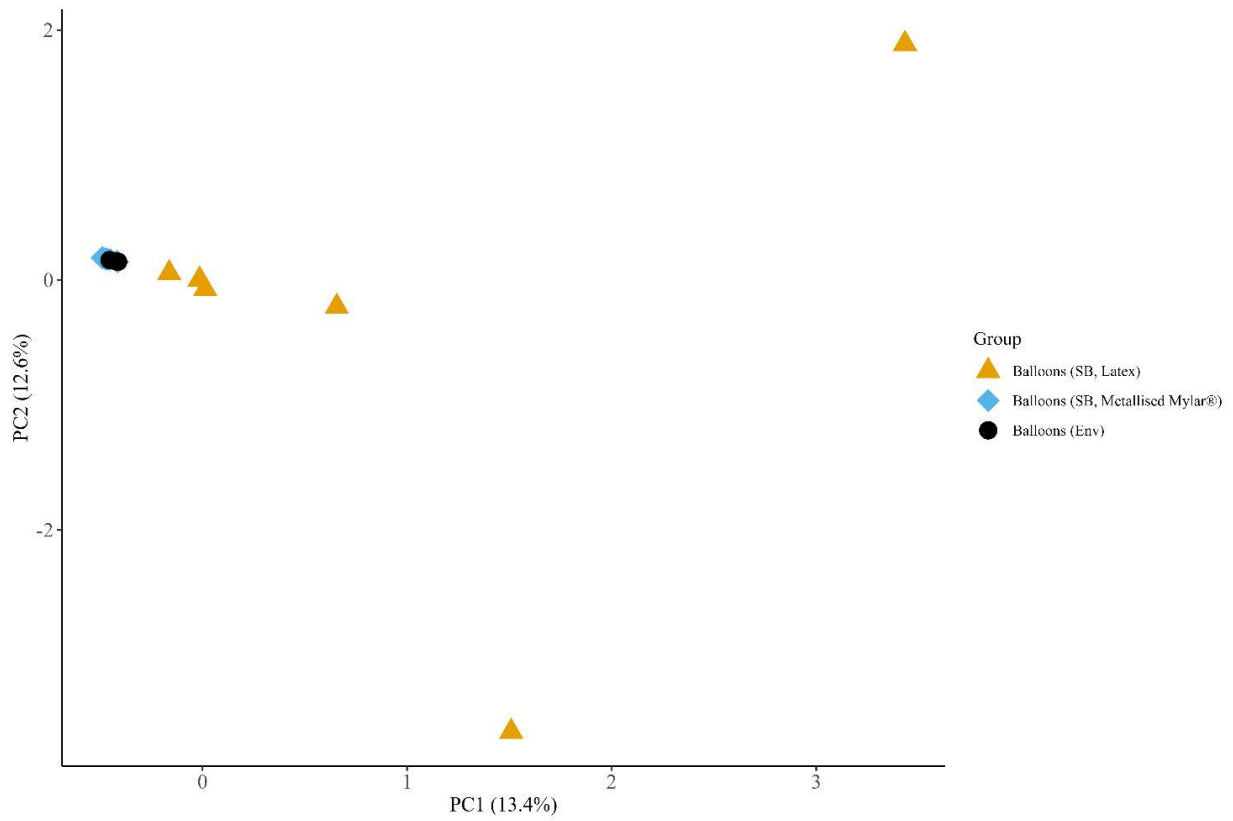

Figure S1: PCA scores plot for environmental balloon samples vs store-bought balloon samples.

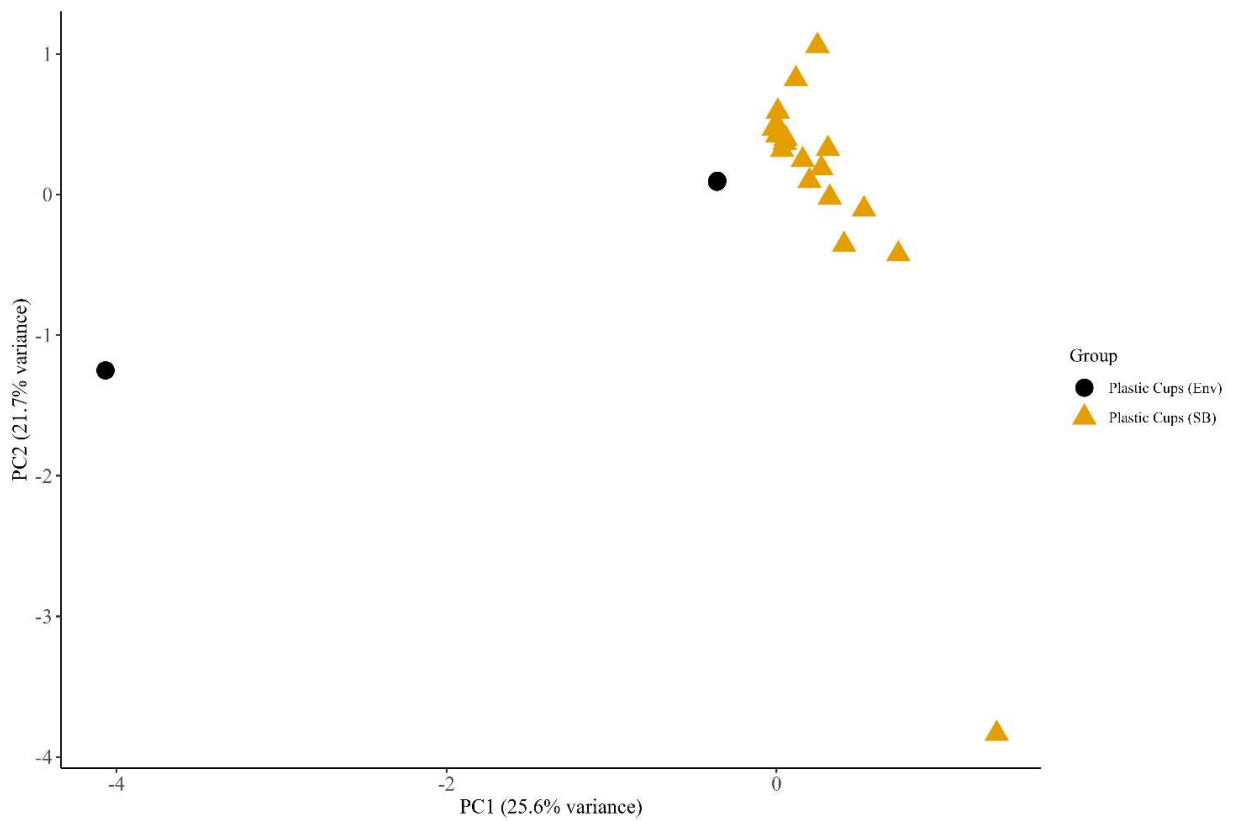

Figure S2: PCA scores plot for environmental plastic cups samples vs store-bought plastic cups samples.
