# Supplementary material
Source: Royal Society of Chemistry journal article supplement (doi:10.1039/d6em00100a)

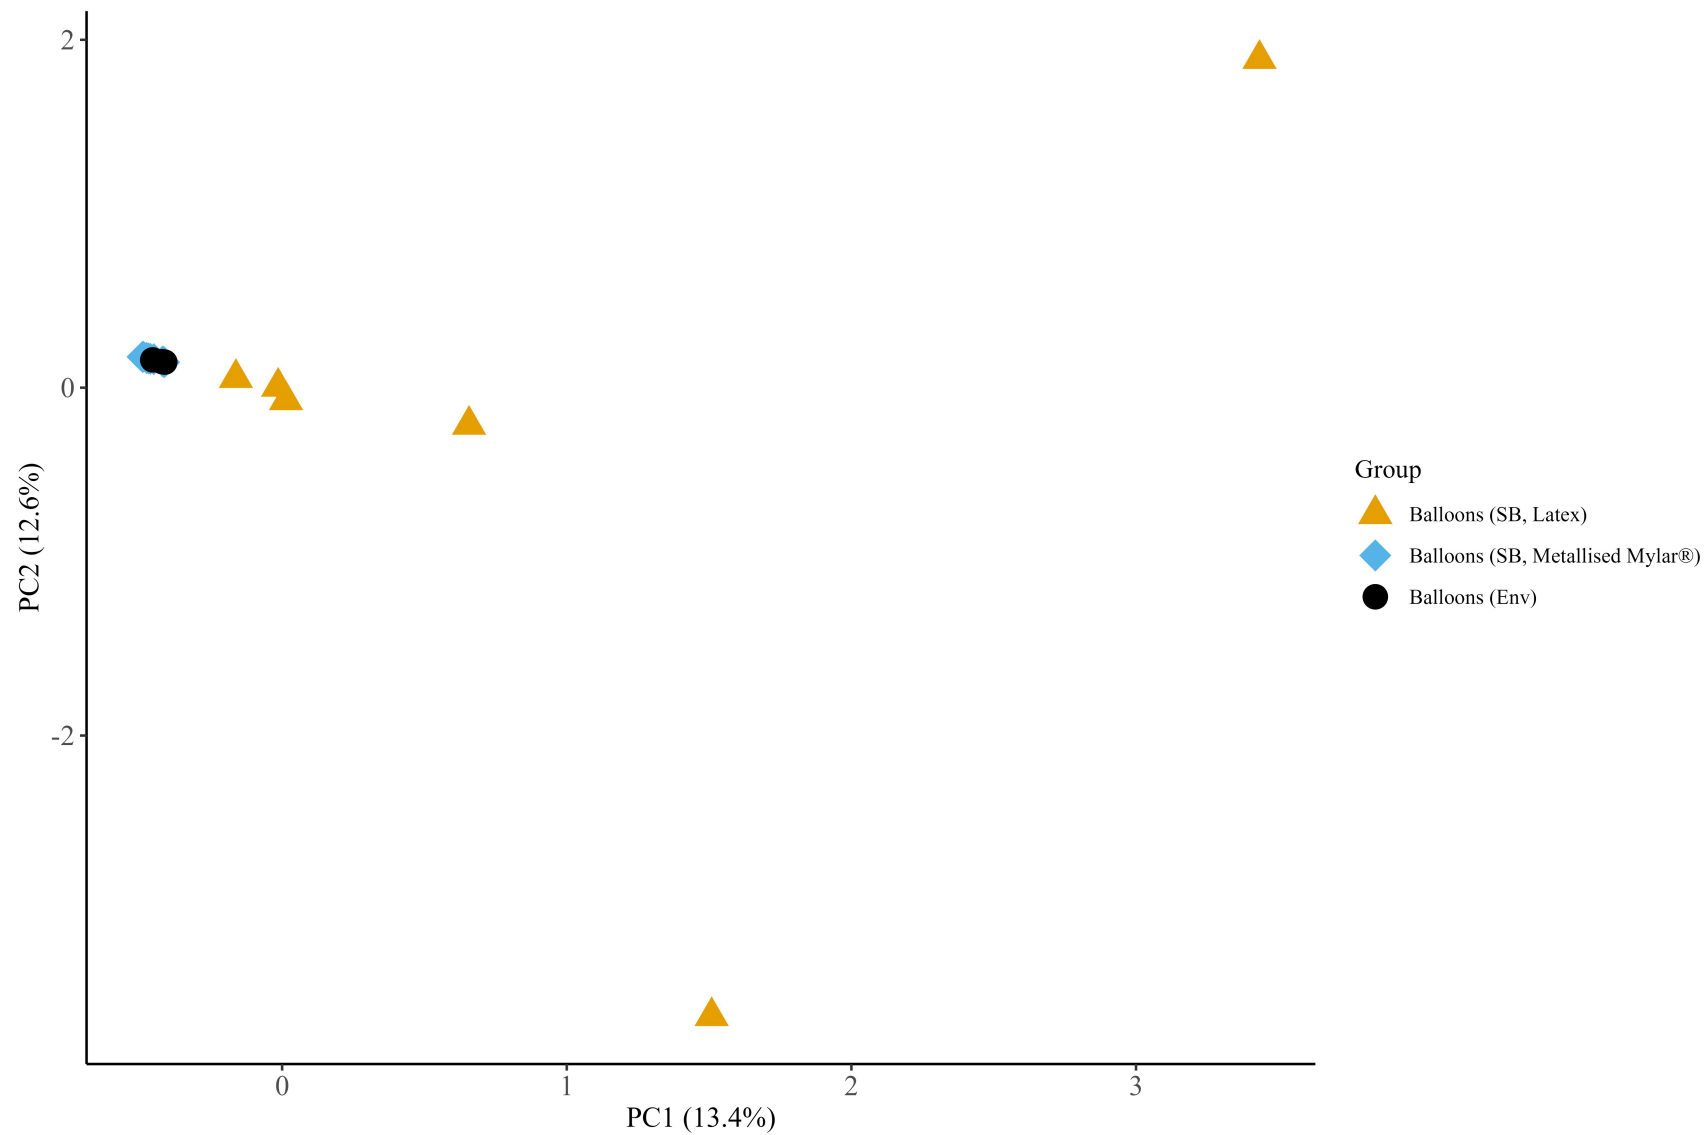

Supplement: d6em00100a1.pdf [file d6em00100a1.pdf]

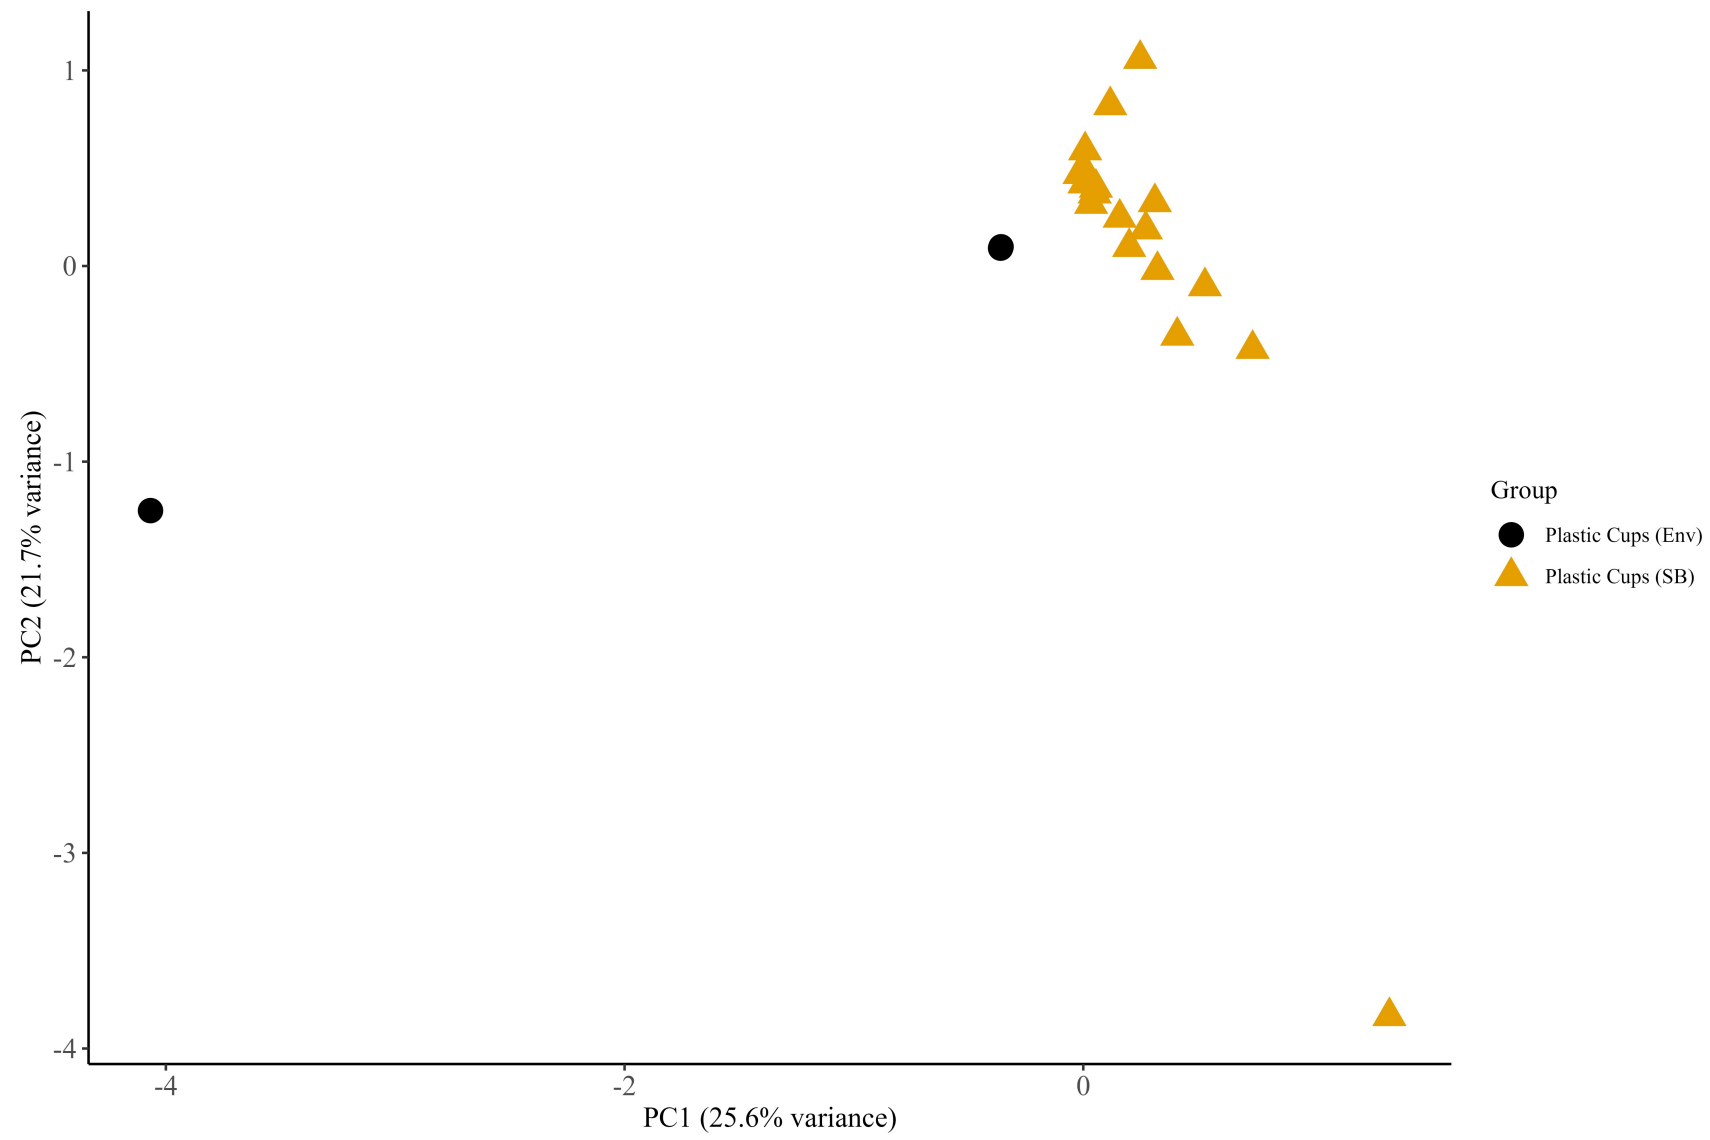

Supplement: d6em00100a2.pdf [file d6em00100a2.pdf]
